# Supplementary material for: Molecular clustering identifies complement and endothelin induction as early events in a mouse model of glaucoma
Source: JCI journal article supplement (doi:10.1172/jci44646), 2011-04-01

## Supplemental material

**Figure S1. Identifying molecular stages of disease in the optic nerve head by hierarchical clustering.** (A) Two comparisons were used to identify disease-associated DE genes for clustering ONH samples. The first comparison identified genes that were DE due to glaucoma progression or *Gpnmb* genotype. The second comparison, between 4.5 months old DBA/2J and 10.5 months D2-*Gpnmb*<sup>+</sup> mice allowed subtraction of genes that differed due to *Gpnmb* genotype. 4.5 months old DBA/2J mice have never demonstrated high IOP or glaucoma in our colony (34). (B-C) Distributions of axon numbers. There is no significant axon loss in either eyes with NOE damage (B) or molecular stages 1 and 2 (C), compared to *Gpnmb*<sup>+</sup> eyes. Half of the eyes in molecular stage 3 have no axon loss indicating that the similar patterns of gene expression that define all eyes in this stage are established prior to axon loss. Significant axon loss is clearly present in all eyes with conventionally defined moderate (MOD) and severe (SEV) glaucoma (B), and the subset of these eyes in stages 4 and 5 (C). The green diamonds indicate the mean and the 95% confidence interval.

**Figure S2. Composition of the three groups (dataset 1, 2, and 3)**

In this study, 50 eyes were grouped based on three distinct criteria. The middle column shows all 50 eyes used in the gene expression profiling study. Each eye is named based on the conventional morphological criteria (optic nerve damage assessment) followed by a sequential number. The way in which the eyes clustered into molecular groups based on hierarchical clustering of either the ONH (left, Figure 1) or retina (right, Figure 7) gene expression profiles are shown. Blue lines connect the same eye in each column.

**Figure S3: ECM-receptor interaction pathway in ONH.**

(A) A high scoring network of DE genes in the ONH that was generated using IPA when comparing stage 2 to D2-*Gpnmb*<sup>+</sup> controls. The network contains genes of the ECM-receptor interaction pathway. Within this network, genes that control the function of other ECM-relevant genes include IL1B (IL1 in network) and ITGB3. Gene names are standard names provided by IPA. Up-regulated genes are shown in red, down-regulated genes in green. The darker the color, the greater the relative fold changes with respect to D2-*Gpnmb*<sup>+</sup> controls. Genes are classified based on their function. The shape associated with the gene name(s) relates to the known/putative functional class (diamonds = enzymes, ovals = transcription factors, triangles = kinases, and circles = others). Solid lines indicate direct interactions and dotted lines indicate indirect interactions. (B) Expression levels for *Itgb3*, *Il1b* and *Casp1* (also known as interleukin converting enzyme, an activator of *Il1b*). All of these genes are differentially expressed compared to D2-*Gpnmb*<sup>+</sup> controls ( $q \leq 0.05$ ) across all stages of disease.

**Figure S4: Figure of merit analysis for k-means clustering.** The slope of the line indicates the most ideal number of clusters for k-means clustering. In Figure of merit analysis, most information will be obtained as the line levels out. We assessed  $k=4, 6, 8, 10$  and  $12$  (arrows). Based on this merit analysis, we present the data for  $k=8$  (red arrow, see Figure 5 and Table 1).

**Figure S5. Early DE genes provide molecular markers to assess glaucoma status in individual eyes.** An independent set of eyes (not included in the microarray study) were assessed. **(A)** Total number of DE genes (from all genes assessed, Table S2) for each eye. Individual eyes are shown in the same order for ONH and retina. Eyes with NOE glaucoma are ordered based on the increasing number of DE genes in the ONH. Any eye was regarded as different to the controls when its number of DE genes was at least twice as high as for the highest control eye (horizontal dashed line, 19 of 21 (ONH) and 14 of 21 eyes (retina, including eyes 1, 11 and 19)). For most NOE eyes, the number of DE genes in the ONH was over half of that in the moderate eyes. This was true for only 6 eyes in the retina. However, in a few eyes the retina appeared more similar to moderate when compared to the ONH. **(B)** The activation status of each tested pathway was determined, based on the number of pathway-specific DE genes. A pathway was considered activated when the number of DE genes for that pathway was twice as high as in the highest control eye (horizontal dashed line). For the ONH, eyes 1-3 are predicted to be at the earliest stages of glaucoma (as maximally only 1 of 3 tested pathways is activated in these eyes). All pathways are activated in eyes 4-16. Interestingly, the complement cascade is activated in the retina in eyes 1-3. The complement cascade is activated in only 10 of the other no or early eyes (including eyes 7, 10 and 20). All pathways were activated in the three moderate eyes.

**Figure S6. Decrease in ratio of lumen to blood vessel area in eyes with glaucoma.** (A) Each black bar represents the average  $\pm$  SEM of all measurements for individual eyes (see Methods).

(B) Ratios at individual locations within each assessed eye. There is a clear decrease at some locations in NOE eyes that are at early stages of glaucoma. 51/56 ratios that were below 0.5 were for vessels in DBA/2J eyes. Only 5/54 of D2-*Gpnmb*<sup>+</sup> control ratios were below this value.

**Supplemental Tables.**

**Table S1: Probe sets used for k-means clustering (see excel file)**

**Table S2: Genes assessed by real time PCR in individual eyes**

| <b>Pathway</b>                          | <b>Tissue Assessed</b> | <b>Genes</b>                                                                                                                                                                                 |
|-----------------------------------------|------------------------|----------------------------------------------------------------------------------------------------------------------------------------------------------------------------------------------|
| ECM-receptor interaction                | Optic nerve head       | <i>Cd44, Cd47, Col11a2, Col3a1, Col4a2, Col4a6, Col5a1, Col5a2, Col6a1, Dag1, Itga1, Itga6, Itgb3, Itgb4, Itgb5, Lama4, Lamb1-1, Lamb2, Lamc1, Sdc4, Spp1, Sv2a, Thbs3, Tnxb, Vwf</i>        |
| MAPK signaling                          | Optic nerve head       | <i>Bdnf, Cacna1b, Cacna1f, Cacna2d3, Cacna2d4, Cacnb2, Dusp8, Fas, Fgf9, Gadd45a, Gng12, Mapkapk3, Mapt, Myc, Nfkb2, Nlk, Ntrk2, Pla2g4a, Relb, Rps6ka1, Rps6ka6, Rras, Tgfbr2, Tnfrsf1a</i> |
| Toll-like receptor signaling            | Optic nerve head       | <i>Casp8, Ccl3, Cd86, Cxcl10, Ifnar1, Ifnar2, Il6, Irak1, Irak4, Irf5, Irf7, Lbp, Ly96, Myd88, Ripk1, Stat1, Ticam1, Tlr2, Tlr4, Tlr6</i>                                                    |
| Complement cascade                      | Retina                 | <i>C1qa, C1qb, C1qc, C2, C3, C3ar1, C4b, C5ar1, C6, C8b, Cr2, Crry</i>                                                                                                                       |
| Miscellaneous (DE, stages R1 and/or R2) | Retina                 | <i>Ccl12, Chi3l1, Ecel1, Gal, Hrk, Lcn2, Osmr, Stat3, Steap4, Tnfrsf12a</i>                                                                                                                  |

**Table S3: Primer sequences for RTPCR (see excel file)**

Figure S1

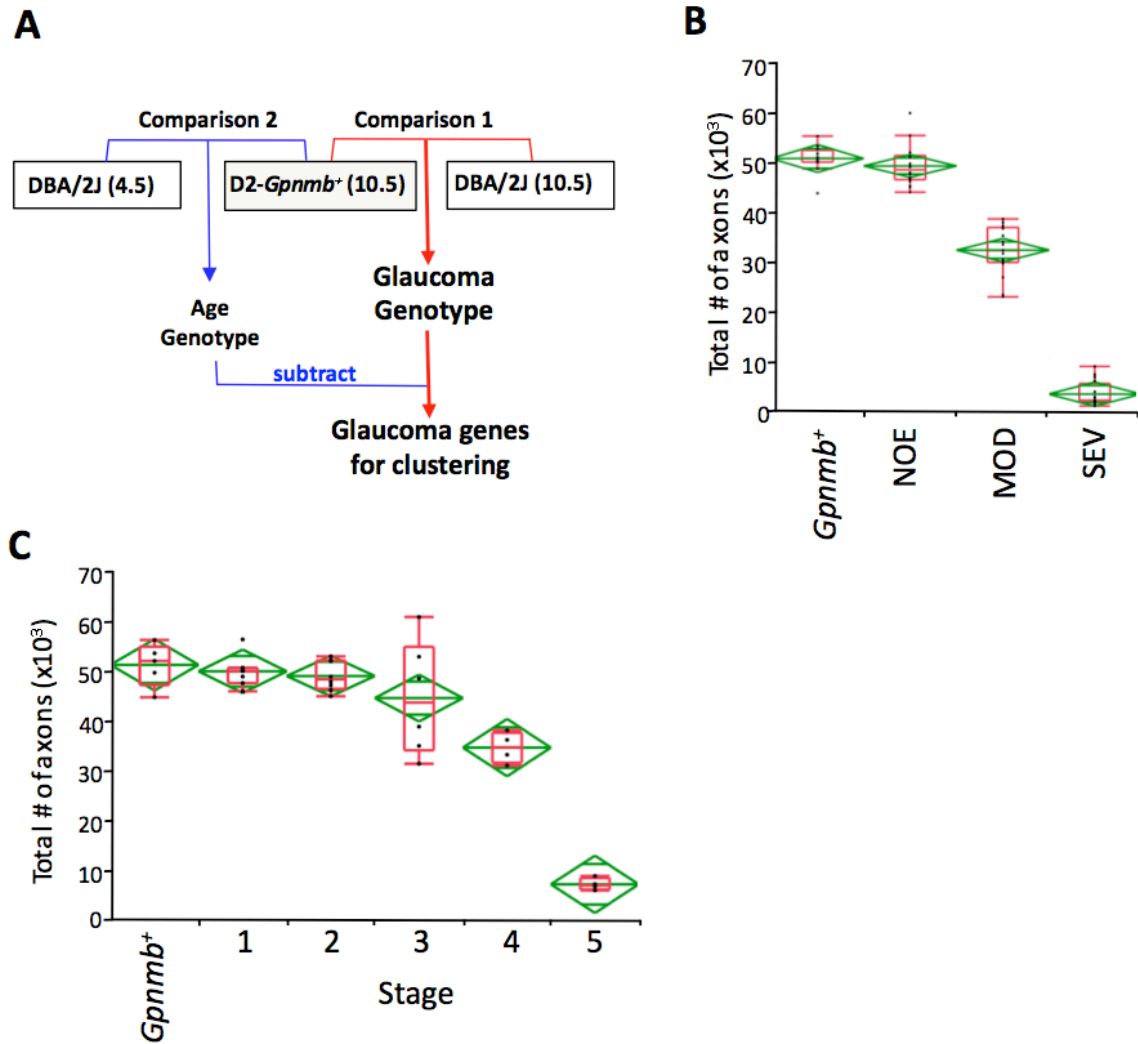



Figure S2

Molecular ONH: dataset 1

Morphological: dataset 2

Molecular retina: dataset 3

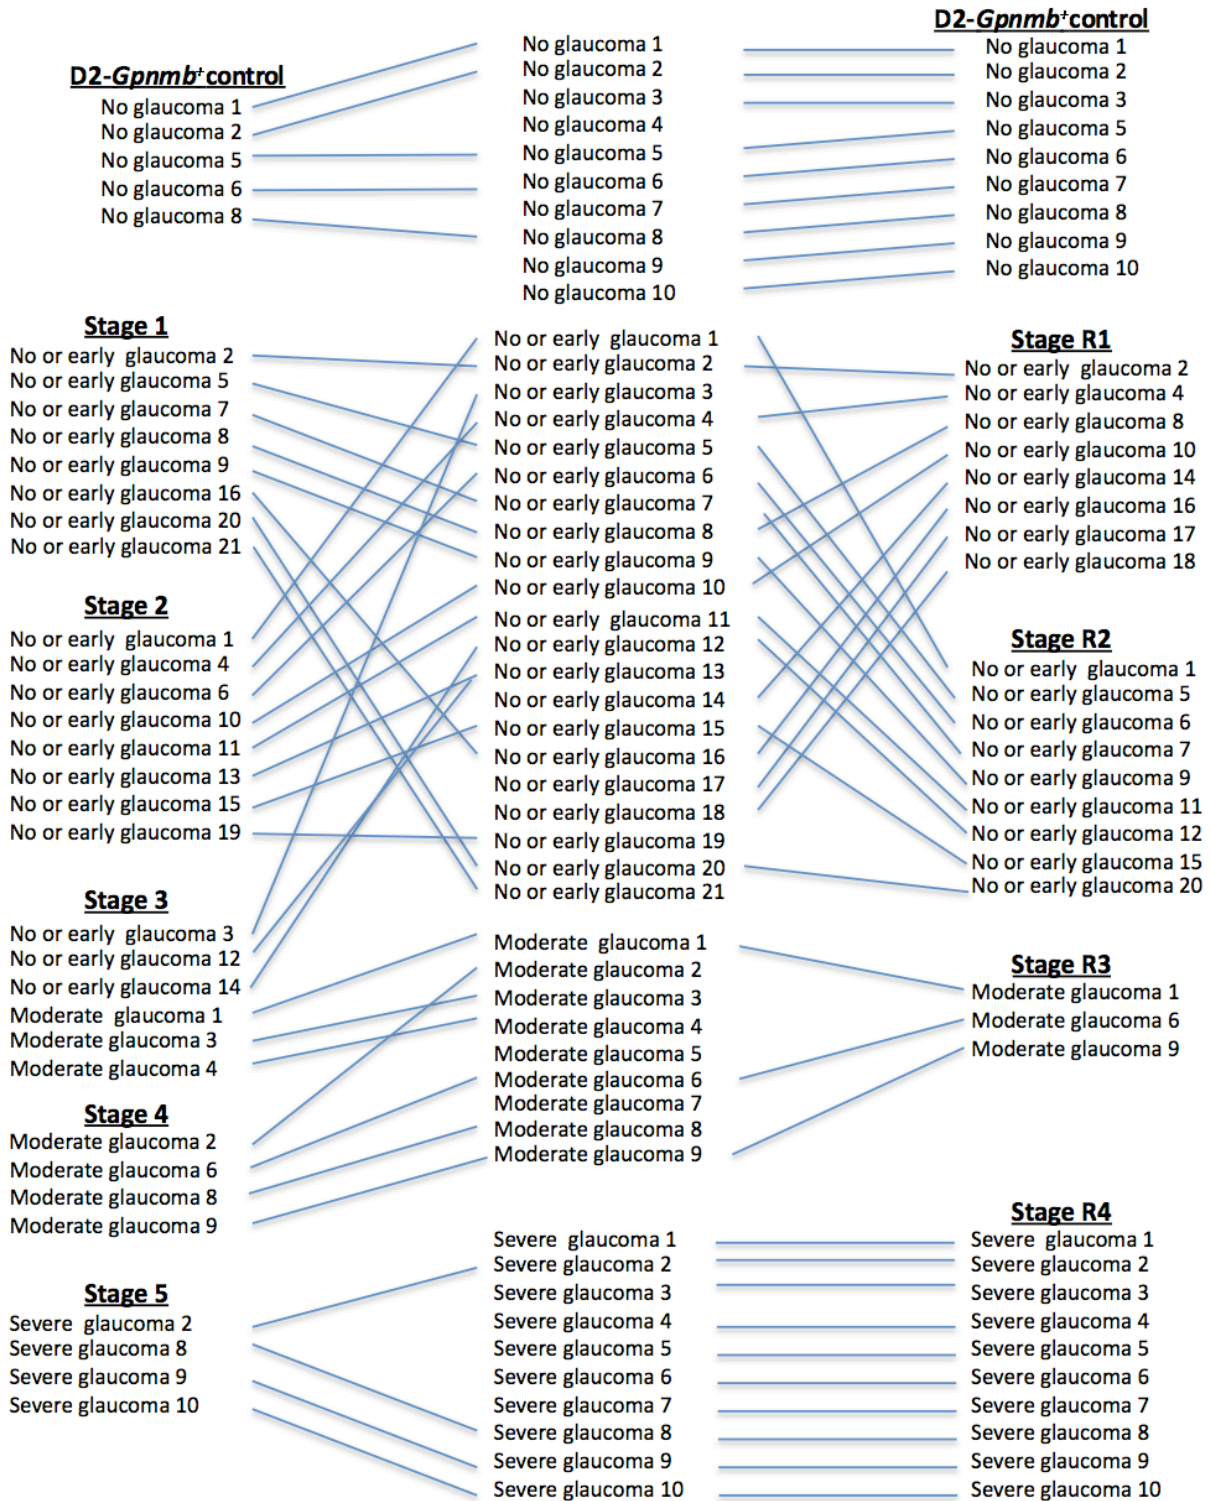

Figure S3

**A**

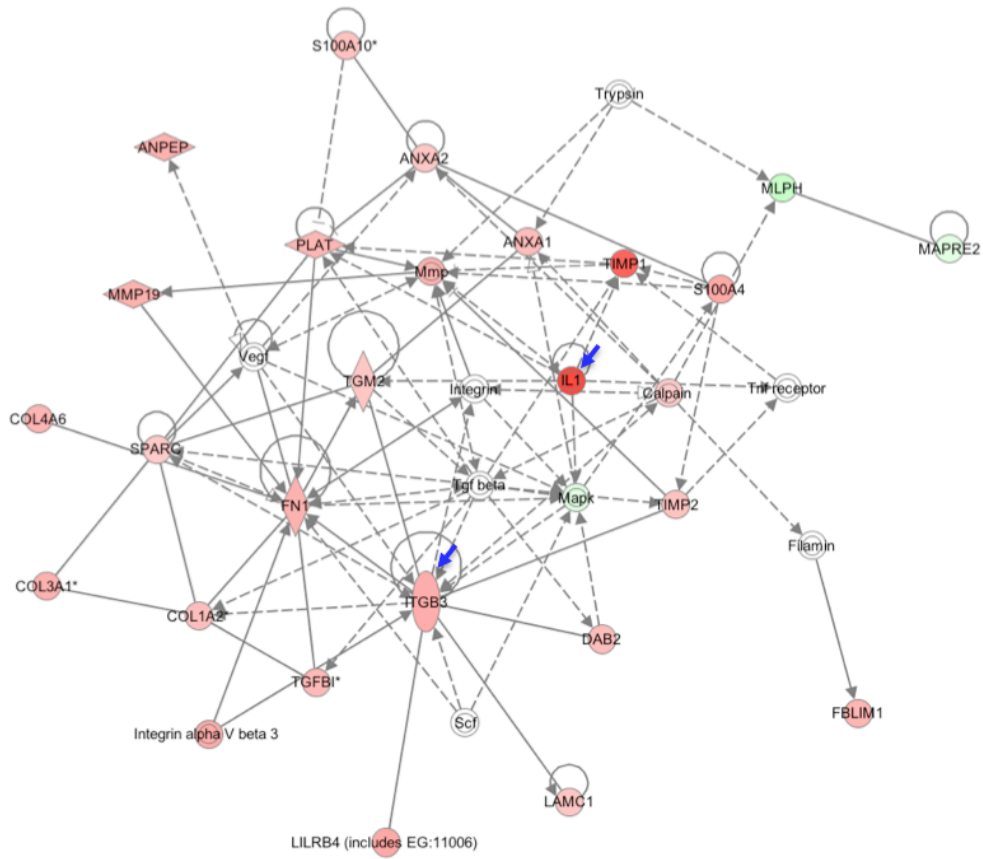

**B**

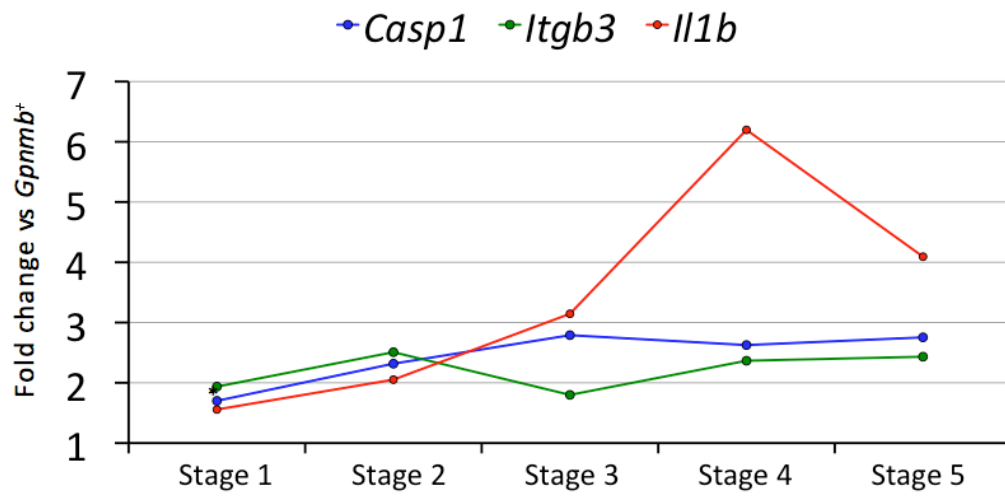

Figure S4

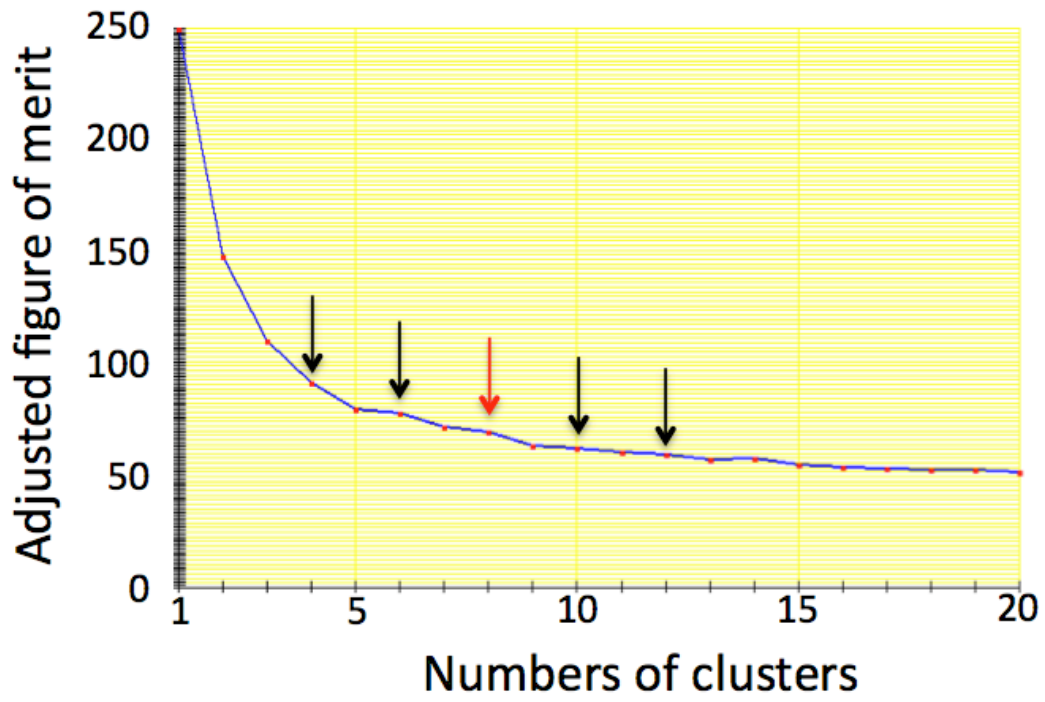

Figure S5

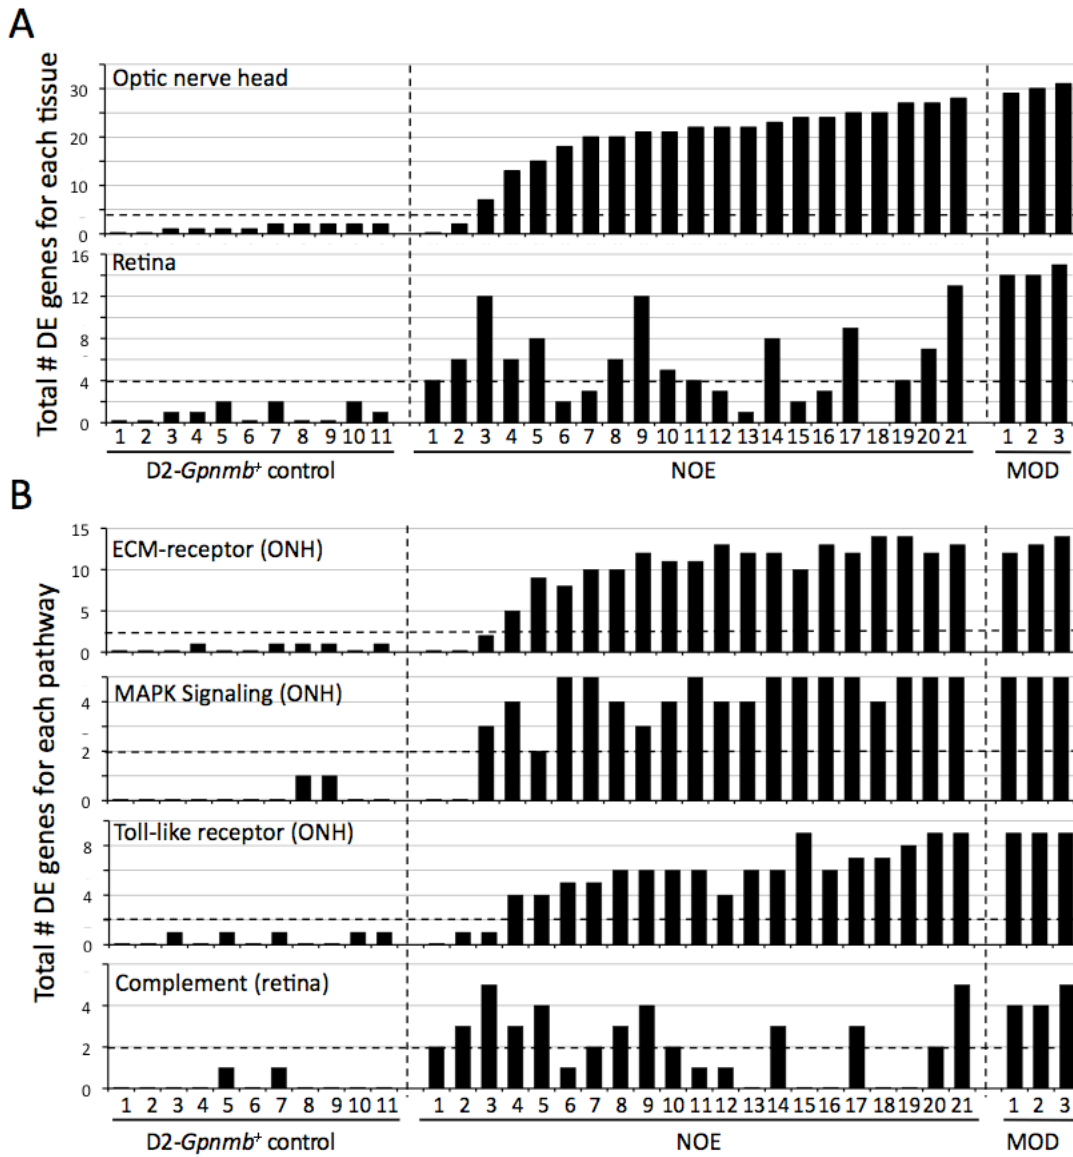

Figure S6

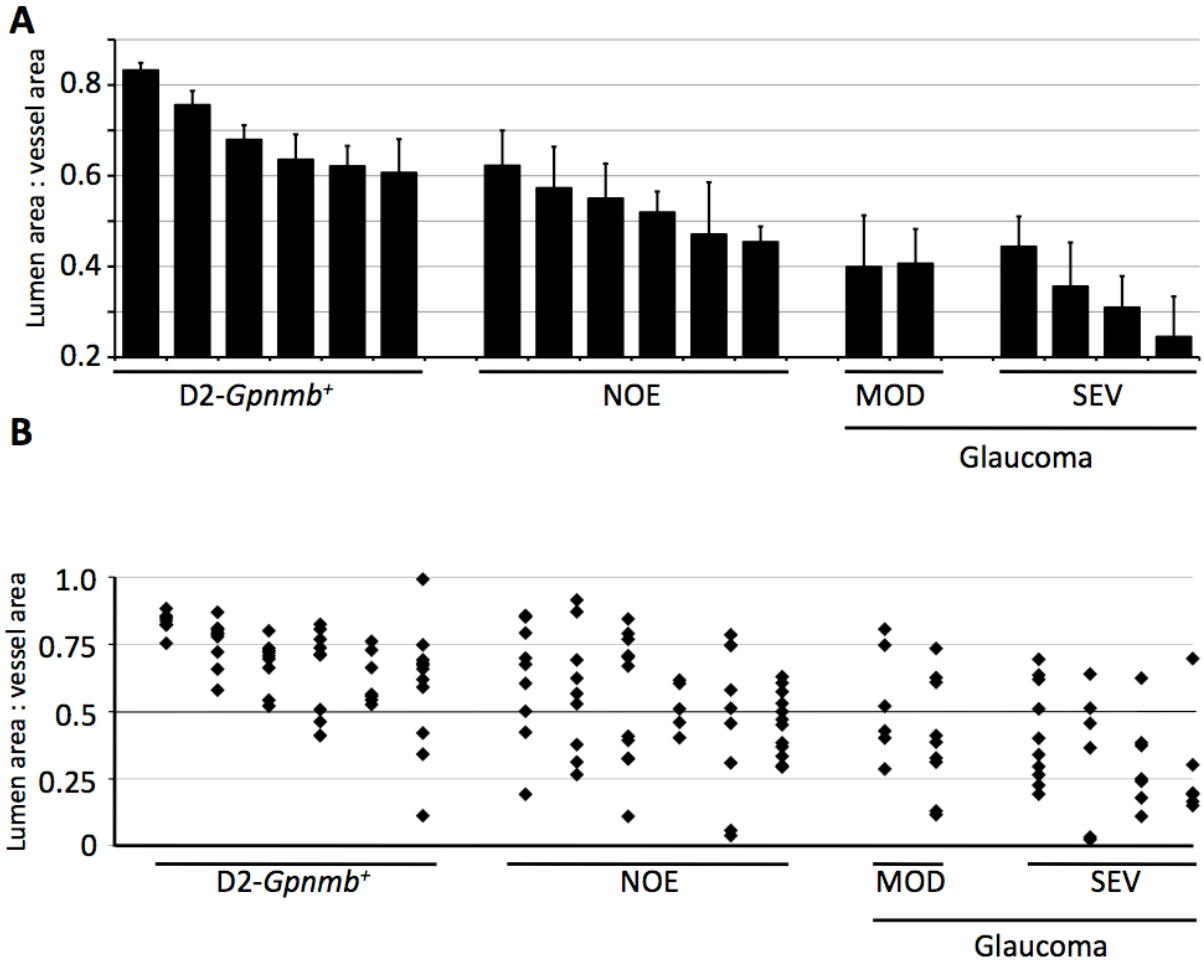

Supplement: sd1 [file 1]
